# Supplementary material
Source: publisher figshare collection journal article supplement (https://karger.figshare.com/ndownloader/files/10182003)
Supplement: Supplementary file 1 [file 10182003]

|  | Unstandardized | | | | | Standardized for changes in population size, age and sex distribution | | | | |
| --- | --- | --- | --- | --- | --- | --- | --- | --- | --- | --- |
| Year | Cost for anti-thyroid medication (euro) | Cost for thyroid hormone therapy (euro) | Cost for thyroid surgeries (euro) | Cost for radio-iodine treatments (euro)3 | Total cost for treatments (euro) | Cost for anti-thyroid medication (euro) | Cost for thyroid hormone therapy (euro) | Cost for thyroid surgeries (euro) | Cost for radio-iodine treatments (euro)3 | Total cost for treatments (euro) |
| 1995 | 1,321,403 | 1,648,682 | 5,155,141 | 1,655,244 | 9,780,470 | 1,358,950 | 1,701,103 | 5,330,754 | 1,691,932 | 10,082,739 |
| 1996 | 1,419,419 | 1,728,552 | 5,200,854 | 1,876,553 | 10,225,378 | 1,452,484 | 1,773,356 | 5,319,287 | 1,903,995 | 10,449,122 |
| 1997 | 1,364,623 | 1,799,952 | 5,331,798 | 1,920,815 | 10,417,187 | 1,388,036 | 1,834,912 | 5,400,903 | 1,939,736 | 10,563,587 |
| 19981 | 1,457,988 | 1,899,639 | 5,432,248 | 1,943,709 | 10,733,584 | 1,475,050 | 1,923,882 | 5,498,423 | 1,955,682 | 10,853,037 |
| 1999 | 1,559,268 | 1,991,864 | 5,479,257 | 1,970,419 | 11,000,808 | 1,566,693 | 2,003,569 | 5,499,722 | 1,976,220 | 11,046,204 |
| 20002 | 1,645,265 | 2,113,252 | 5,737,136 | 1,961,261 | 11,456,914 | 1,645,265 | 2,113,252 | 5,737,136 | 1,961,261 | 11,456,914 |
| 2001 | 1,829,933 | 2,262,608 | 5,442,338 | 2,042,917 | 11,577,796 | 1,819,848 | 2,247,432 | 5,417,008 | 2,036,207 | 11,520,495 |
| 2002 | 1,934,954 | 2,419,056 | 5,393,938 | 1,995,603 | 11,743,552 | 1,914,163 | 2,387,546 | 5,338,111 | 1,982,868 | 11,622,689 |
| 2003 | 1,985,497 | 2,586,122 | 5,447,085 | 1,893,342 | 11,912,047 | 1,956,541 | 2,536,709 | 5,376,438 | 1,875,649 | 11,745,337 |
| 2004 | 1,990,219 | 2,763,422 | 5,353,207 | 1,153,863 | 11,260,711 | 1,950,916 | 2,691,987 | 5,267,216 | 1,125,528 | 11,035,647 |
| 2005 | 1,938,770 | 2,895,759 | 5,754,727 | 1,242,387 | 11,831,643 | 1,886,868 | 2,799,323 | 5,594,244 | 1,192,901 | 11,473,336 |
| 2006 | 1,859,920 | 3,077,804 | 5,664,995 | 1,319,463 | 11,922,182 | 1,797,389 | 2,952,739 | 5,533,307 | 1,262,085 | 11,545,520 |
| 2007 | 1,822,033 | 3,275,843 | 5,785,670 | 1,465,986 | 12,349,531 | 1,746,750 | 3,117,410 | 5,604,626 | 1,393,015 | 11,861,801 |
| 2008 | 1,767,983 | 3,506,143 | 5,518,758 | 957,737 | 11,750,620 | 1,678,218 | 3,310,239 | 5,293,419 | 905,101 | 11,186,976 |
| 2009 | 1,692,939 | 3,666,515 | 6,614,764 | 1,097,391 | 13,071,609 | 1,589,380 | 3,429,063 | 6,323,028 | 1,022,001 | 12,363,473 |
| 2010 | 1,638,330 | 3,973,831 | 6,661,933 | 1,429,355 | 13,703,449 | 1,525,700 | 3,685,609 | 6,335,148 | 1,308,332 | 12,854,789 |
| 2011 | 1,590,258 | 4,272,660 | 6,695,938 | 1,528,563 | 14,087,419 | 1,466,740 | 3,929,455 | 6,315,991 | 1,382,776 | 13,094,962 |
| 2012 | 1,556,280 | 4,471,237 | 6,317,384 | 1,517,879 | 13,862,781 | 1,419,110 | 4,075,211 | 5,853,955 | 1,361,102 | 12,709,377 |
| 2013 | 1,512,565 | 4,704,750 | 6,906,198 | 1,420,961 | 14,544,474 | 1,359,894 | 4,247,692 | 6,392,413 | 1,248,101 | 13,248,100 |
| 2014 | 1,484,430 | 4,927,821 | 7,409,104 | 1,434,697 | 15,256,052 | 1,317,754 | 4,406,899 | 6,756,517 | 1,249,437 | 13,730,608 |
| 2015 | 1,512,197 | 5,192,788 | 7,764,229 | 1,556,799 | 16,026,013 | 1,324,842 | 4,594,720 | 7,044,160 | 1,347,100 | 14,310,822 |

Supplementary Table 1: Costs for thyroid disease treatments for the total population in Denmark.

Unstandardized and standardized for changes population size, age and sex distribution. 2015-prices applied. 1Implementation of voluntary iodine fortification. 2Implementation of mandatory iodine fortification. 3Number of radioiodine treatments were obtained from the National Institute of Radiation Protection in 1995-2003 and from the Danish National Patient Registry in 2004-2015.
